# Supplementary material for: Adverse Events of PD-1 or PD-L1 Inhibitors in Triple-Negative Breast Cancer: A Systematic Review and Meta-Analysis
Source: MDPI journal article supplement (doi:10.3390/life12121990), 2022-11-28
Supplement: s1 [file s1]

## Supplementary Material

This supplementary file presents five forest plots illustrating the ORs of the serious hypothyroid, serious adrenal insufficiency, non-serious AST elevation, non-serious rash, and the non-serious fever, respectively, in patients treated with PD-1 or PD-L1 inhibitors versus the patients treated with chemotherapy. In particular, Figure S1 shows the forest plot of serious hypothyroid in patients treated with PD-1 or PD-L1 inhibitors versus chemotherapy; Figure S2 presents the forest plot of serious adrenal insufficiency in patients; Figure S3 displays the forest plot of non-severe AST elevation in patients; Figure S4 shows the forest plot of other rash in patients; and Figure S5 presents the forest plot of non-severe fever in patients.

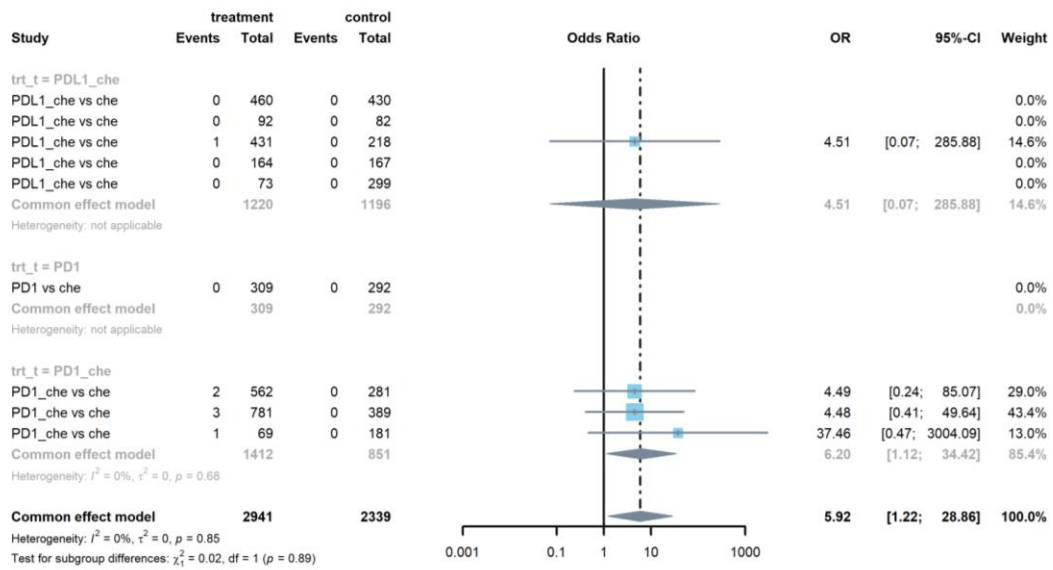

**Figure S1.** Forest plot of serious hypothyroidism in patients treated with PD-1 or PD-L1 inhibitors versus chemotherapy.

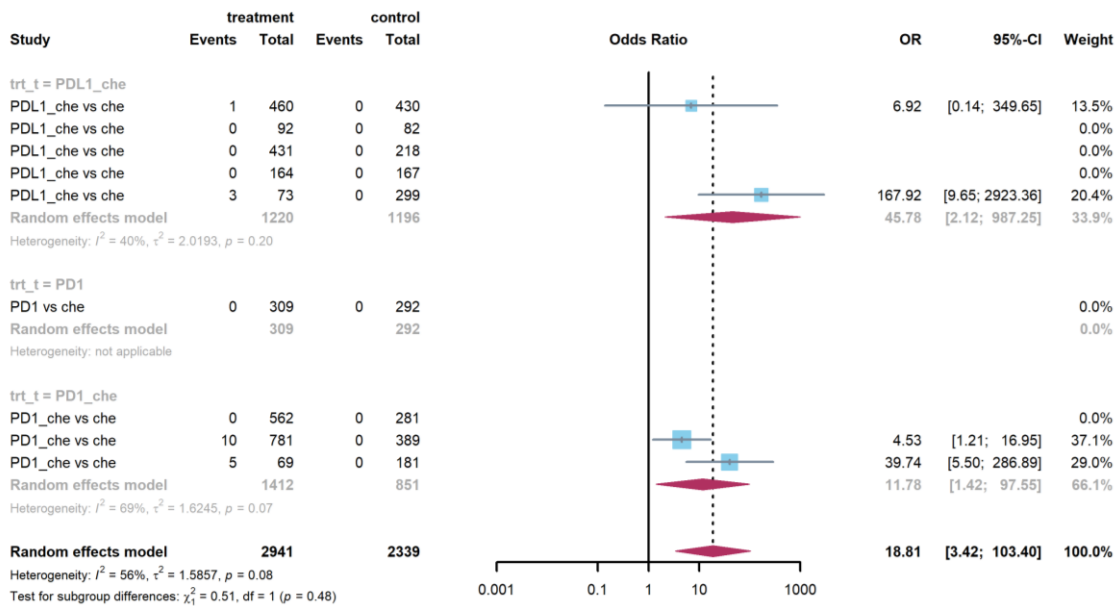

**Figure S2.** Forest plot of serious adrenal insufficiency in patients treated with PD-1 or PD-L1 inhibitors versus chemotherapy.

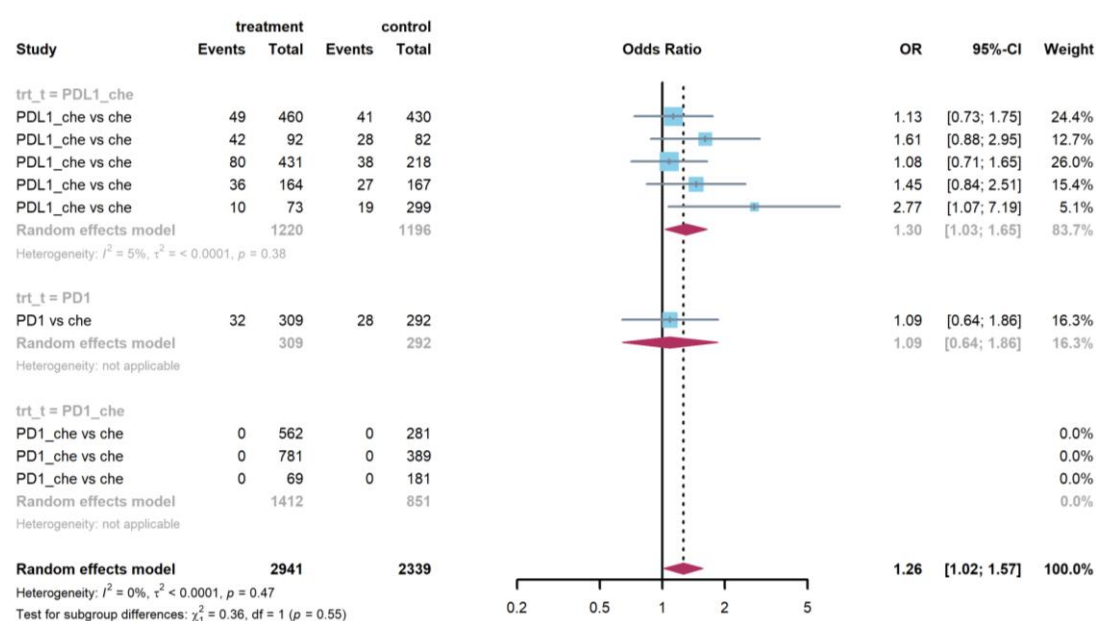

**Figure S3.** Forest plot of other AST elevation in patients treated with PD-1 or PD-L1 inhibitors versus chemotherapy.

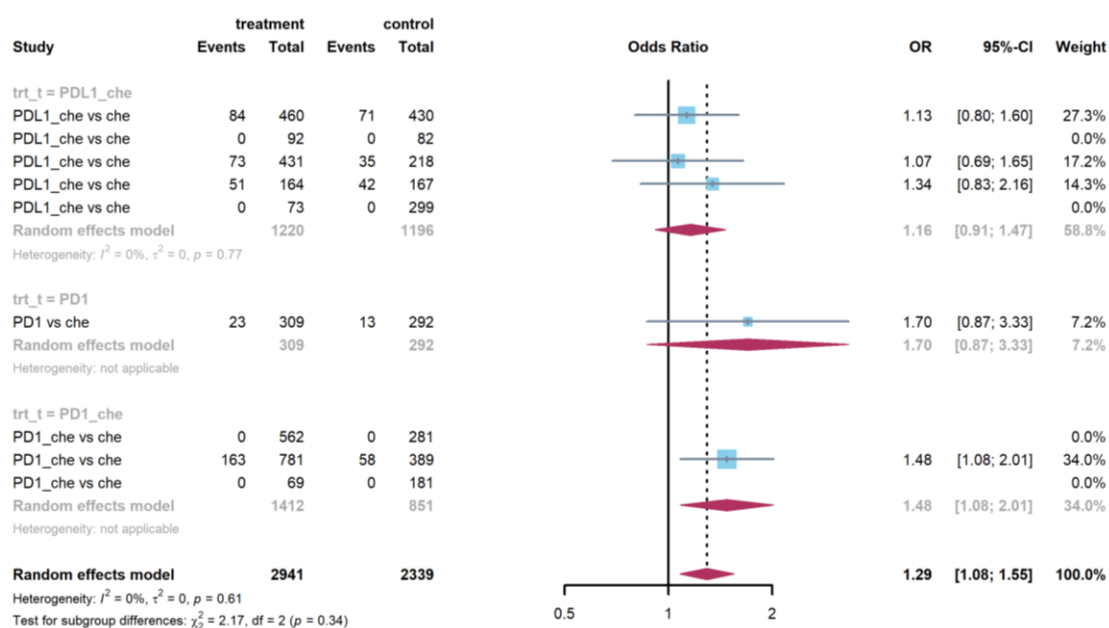

**Figure S4.** Forest plot of other rashes in patients treated with PD-1 or PD-L1 inhibitors versus chemotherapy.

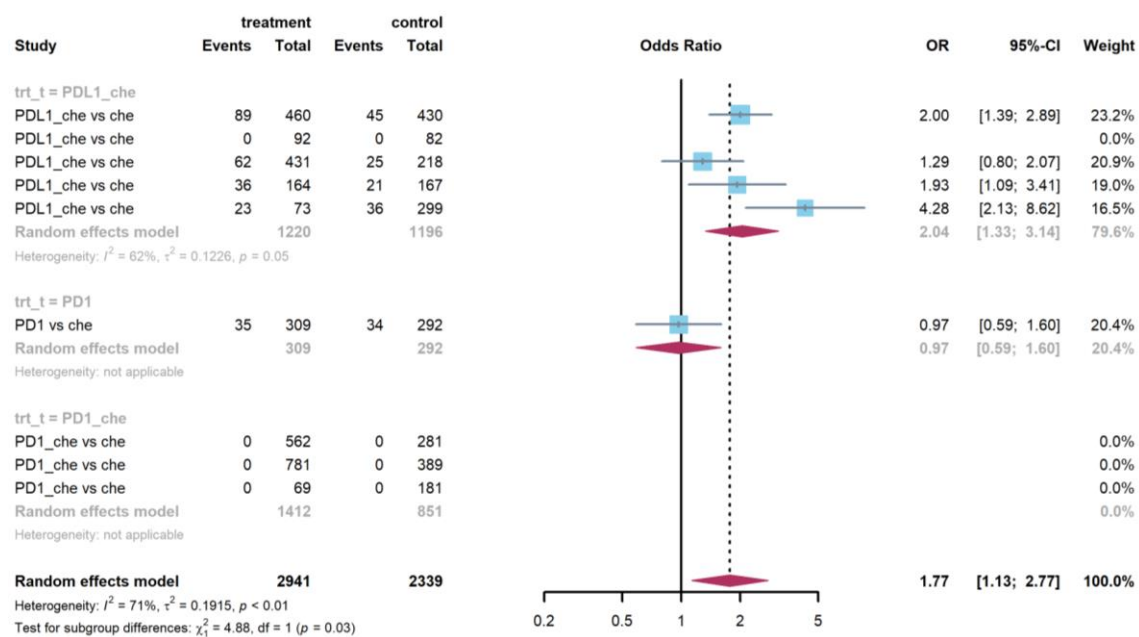

**Figure S5.** Forest plot of other fevers in patients treated with PD-1 or PD-L1 inhibitors versus chemotherapy.
